# Supplementary material for: Selective deletion of one carbon atom from C60 through benzylamine mediated reactions
Source: Royal Society of Chemistry journal article supplement (doi:10.1039/d4qo00449c), 2024-01-01
Supplement: d4qo00449c1.pdf [file d4qo00449c1.pdf]

## Table of Contents

|                                                                                            |     |
|--------------------------------------------------------------------------------------------|-----|
| <sup>1</sup> H and <sup>13</sup> C NMR, HRMS spectra for compound <b>2</b> .....           | S2  |
| <sup>1</sup> H and <sup>13</sup> C NMR, HMBC NMR, HRMS spectra for compound <b>3</b> ..... | S3  |
| <sup>1</sup> H and <sup>13</sup> C NMR, HMBC NMR, HRMS spectra for compound <b>4</b> ..... | S5  |
| <sup>1</sup> H and <sup>13</sup> C NMR, HMBC NMR, HRMS spectra for compound <b>5</b> ..... | S7  |
| <sup>1</sup> H and <sup>13</sup> C NMR, HMBC NMR, HRMS spectra for compound <b>6</b> ..... | S9  |
| <sup>1</sup> H and <sup>13</sup> C NMR, HRMS spectra for compound <b>7</b> .....           | S11 |
| <sup>13</sup> C NMR for compound <b>8</b> .....                                            | S13 |
| IR spectra for compounds <b>5</b> and <b>7</b> .....                                       | S13 |
| UV-Vis spectra for compounds <b>5</b> and <b>7</b> .....                                   | S14 |

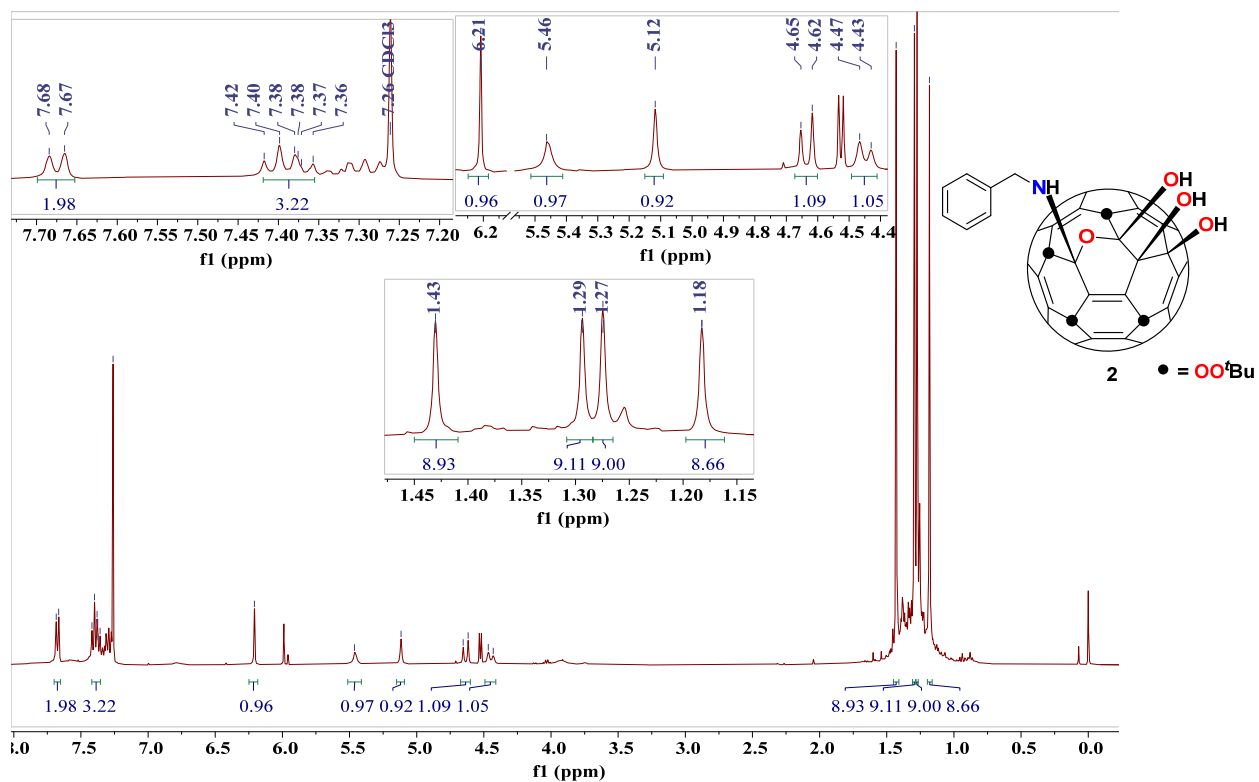

Figure S1  $^1\text{H}$  NMR spectrum of **2** (in  $\text{CDCl}_3$ )

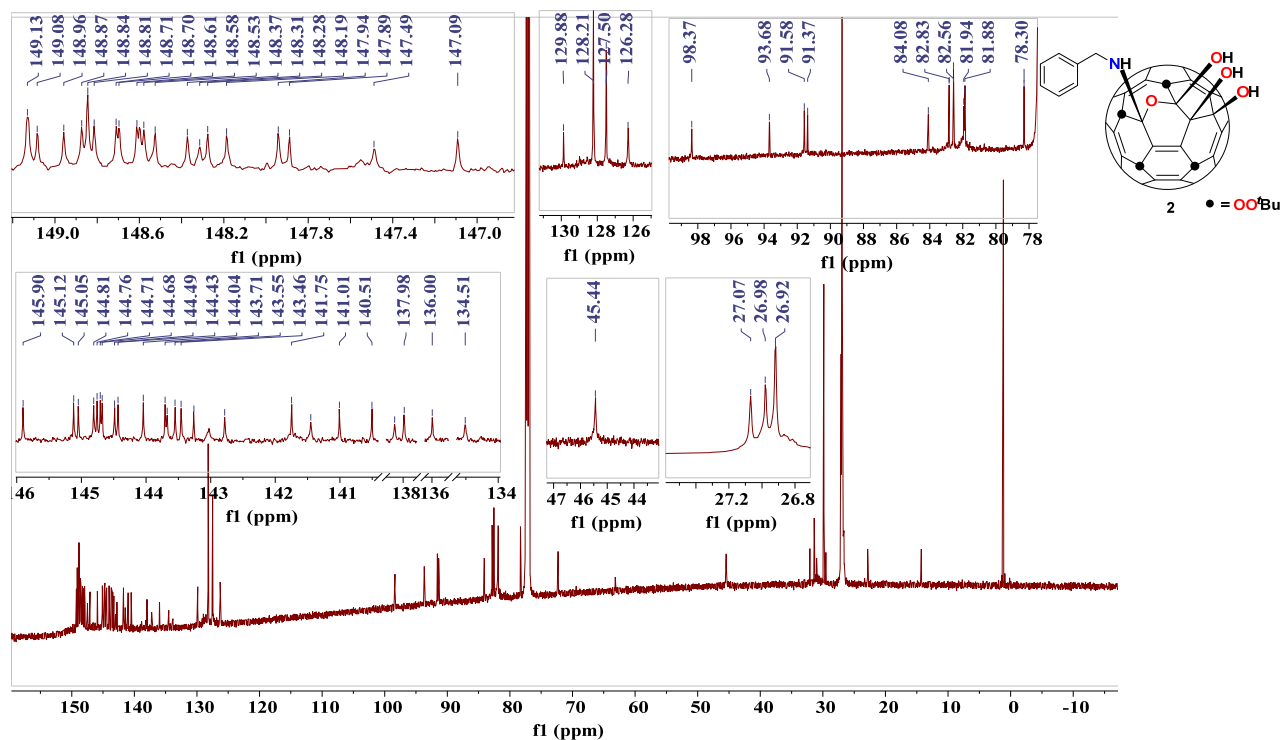

Figure S2  $^{13}\text{C}$  NMR spectrum of **2** (in  $\text{CDCl}_3$ )

## Peking University Mass Spectrometry Sample Analysis Report

### Analysis Info

Analysis Name FTMS-24020060\_Pos\_20240227\_000009.d  
 Sample 5ba  
 Comment

Acquisition Date 2/27/2024 6:29:58 PM  
 Instrument Bruker Solarix XR FTMS  
 Operator Peking University

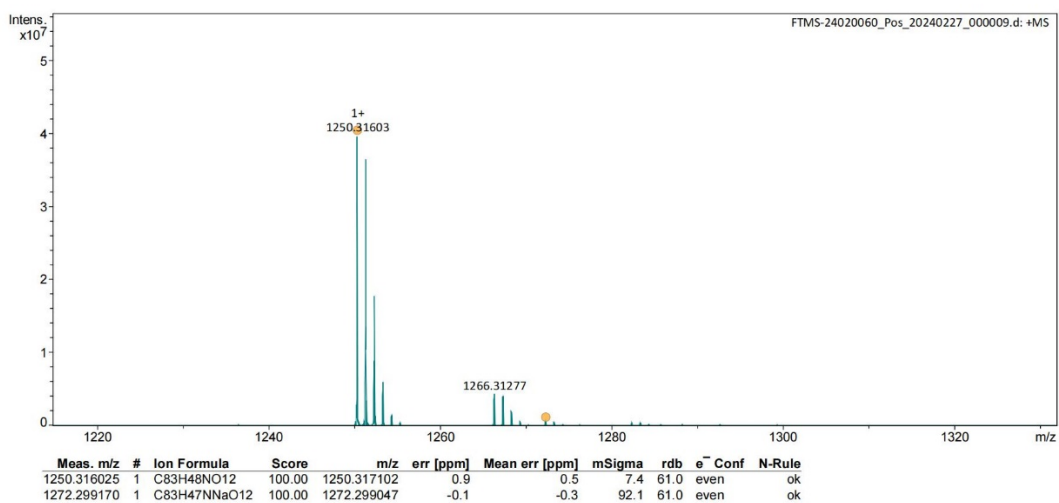

Figure S3 Mass spectrum of **2**

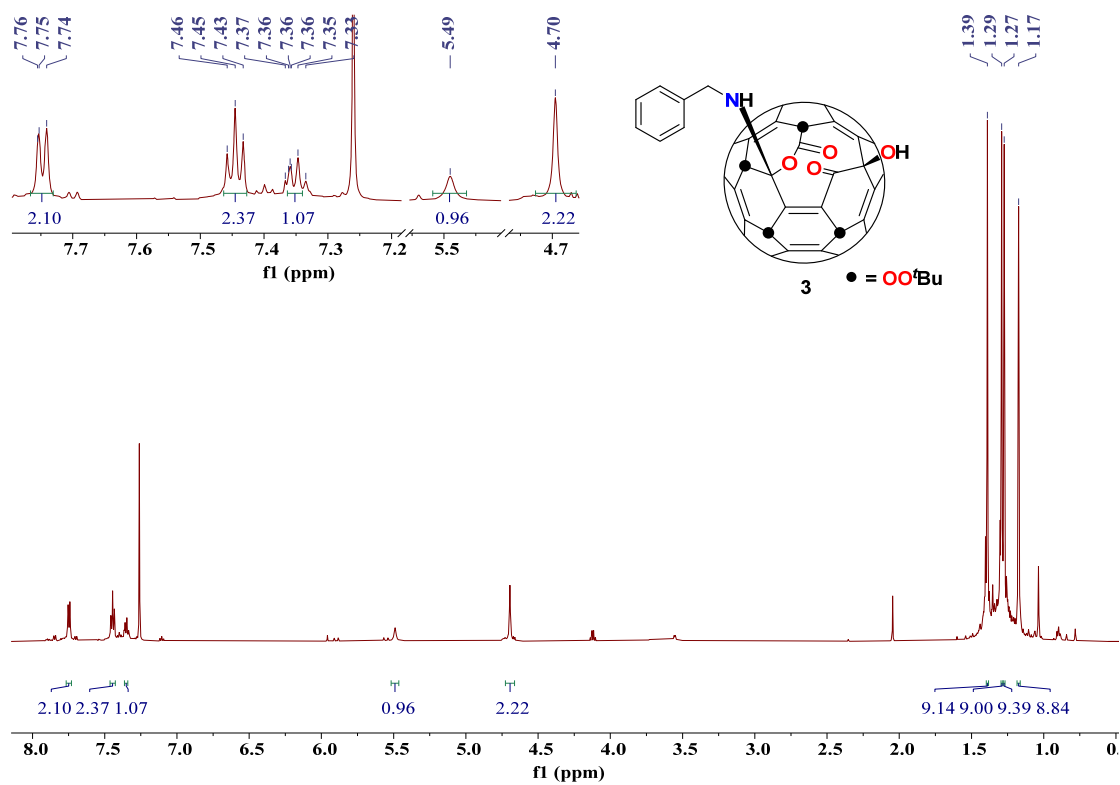

Figure S4 <sup>1</sup>H NMR spectrum of **3** (in CDCl<sub>3</sub>)

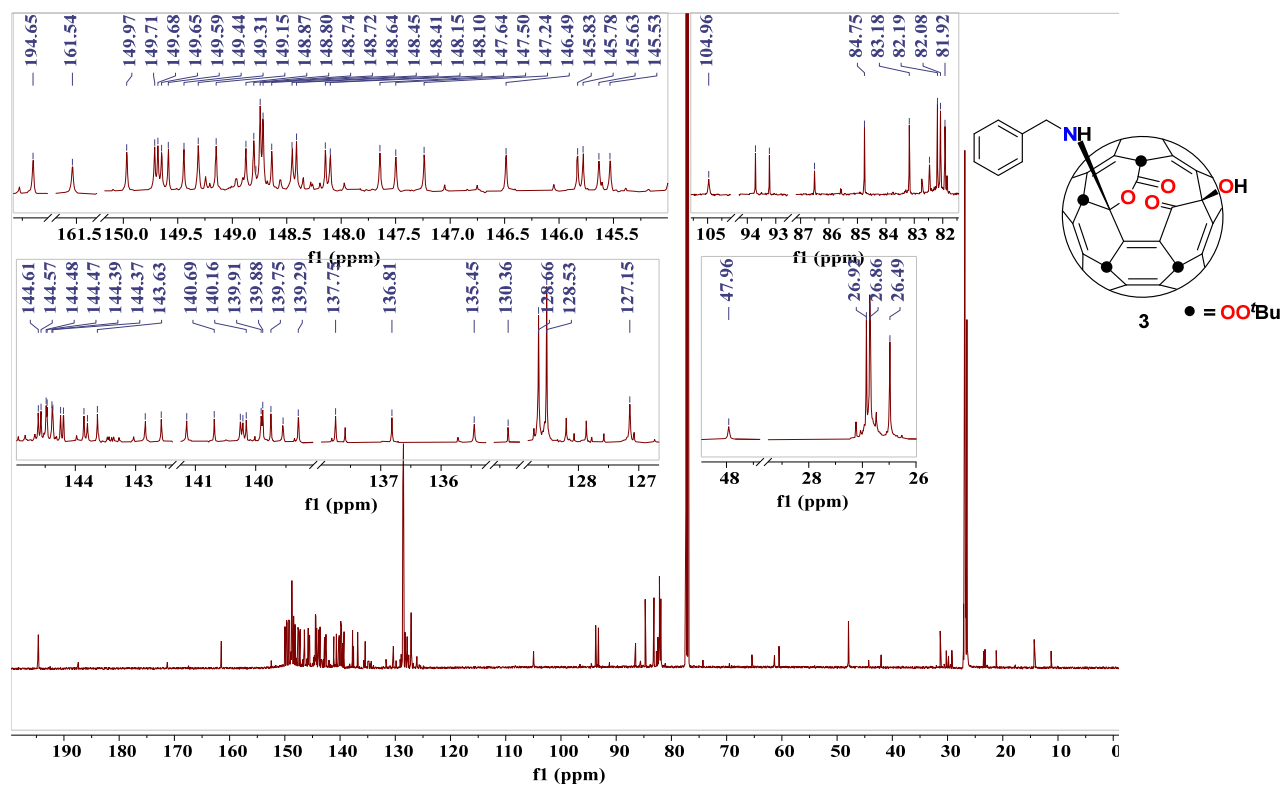

Figure S5  $^{13}\text{C}$  NMR spectrum of **3** (in  $\text{CDCl}_3$ )

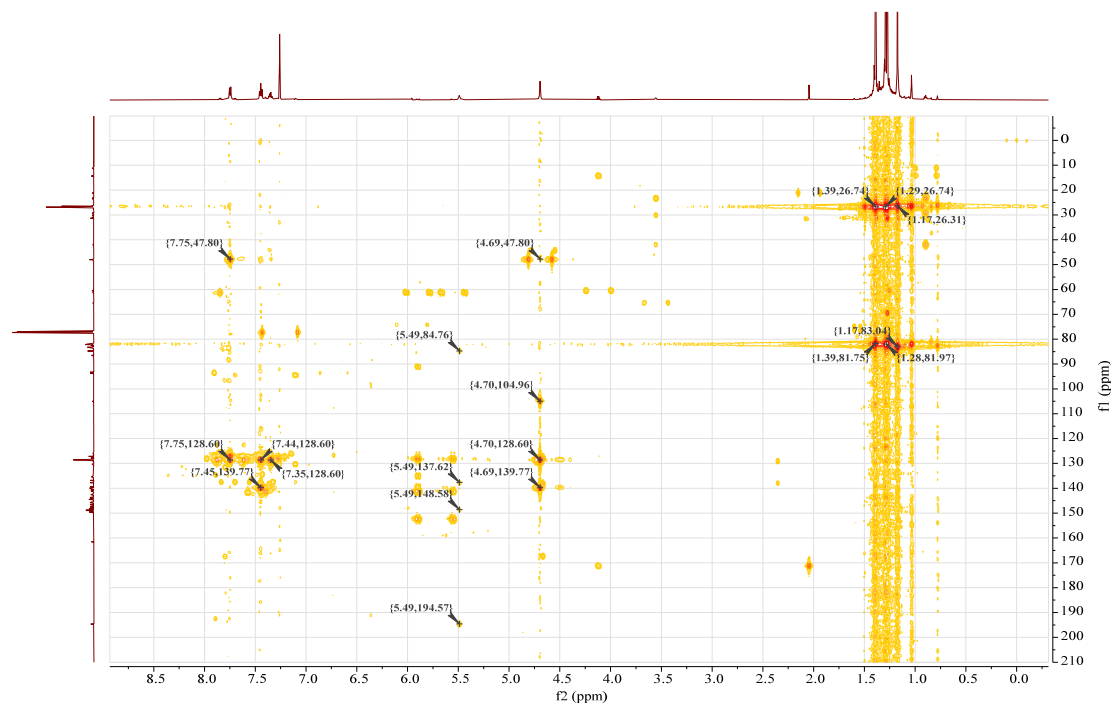

Figure S6 HMBC NMR spectrum of **3** (in  $\text{CDCl}_3$ )

## Peking University Mass Spectrometry Sample Analysis Report

### Analysis Info

Analysis Name FTMS-23100086\_Pos\_20231016\_000003.d  
 Sample 7  
 Comment

Acquisition Date 10/16/2023 5:23:37 PM  
 Instrument Bruker Solarix XR FTMS  
 Operator Peking University

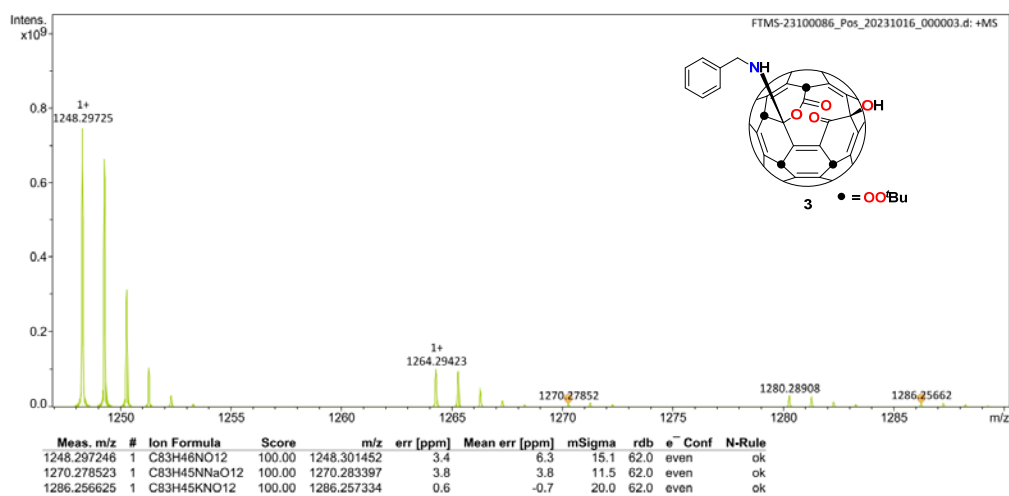

Figure S7 Mass spectrum of **3**

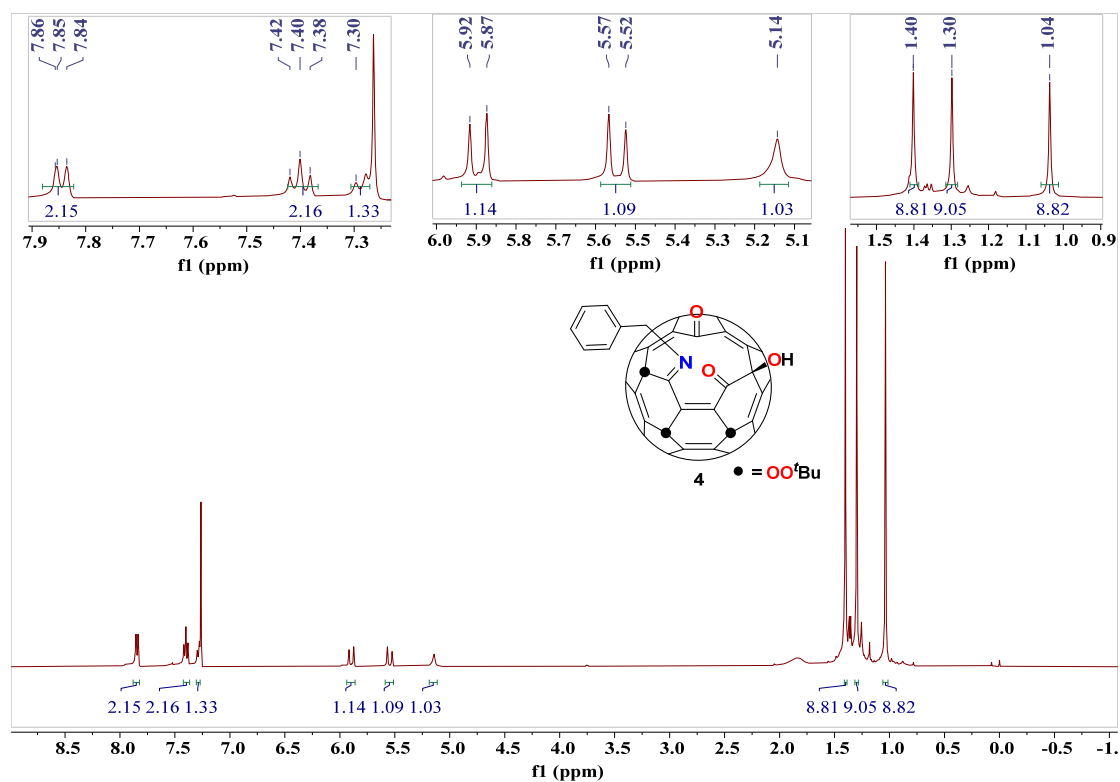

Figure S8 <sup>1</sup>H NMR spectrum of **4** (in CDCl<sub>3</sub>)

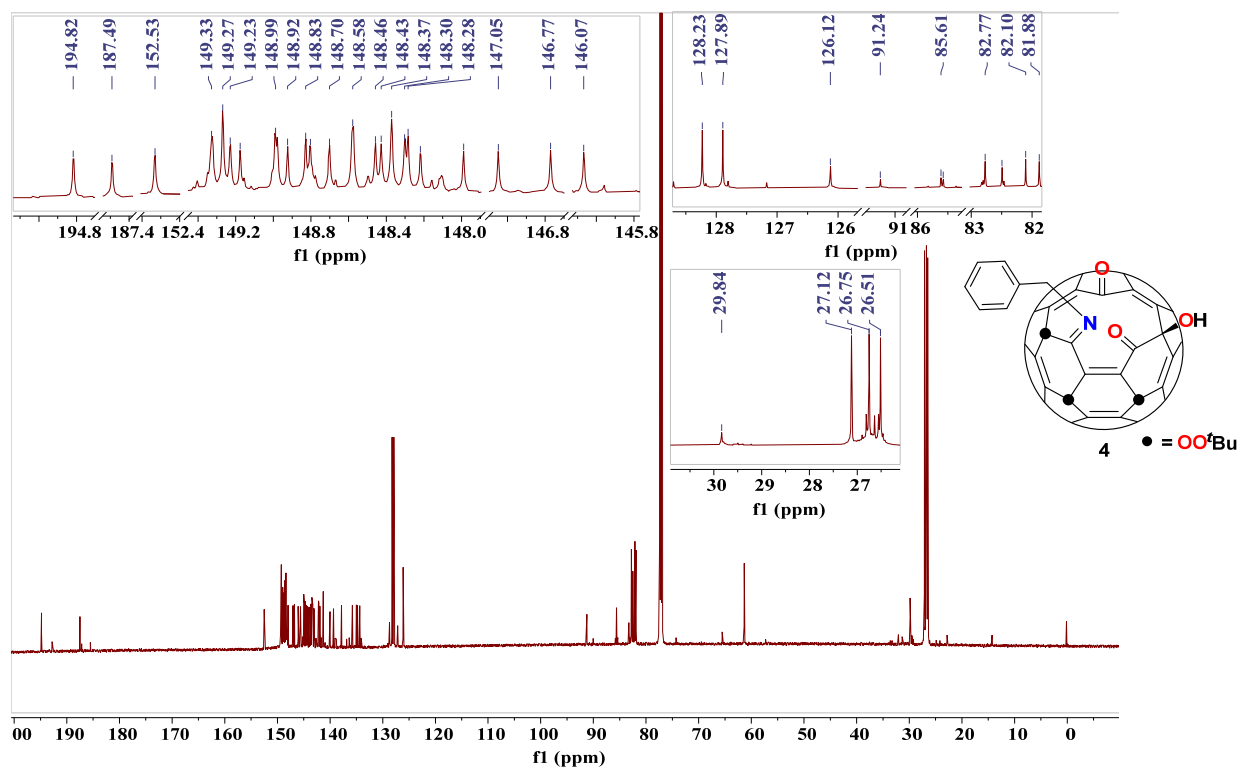

Figure S9  $^{13}\text{C}$  NMR spectrum of **4** (in  $\text{CDCl}_3$ )

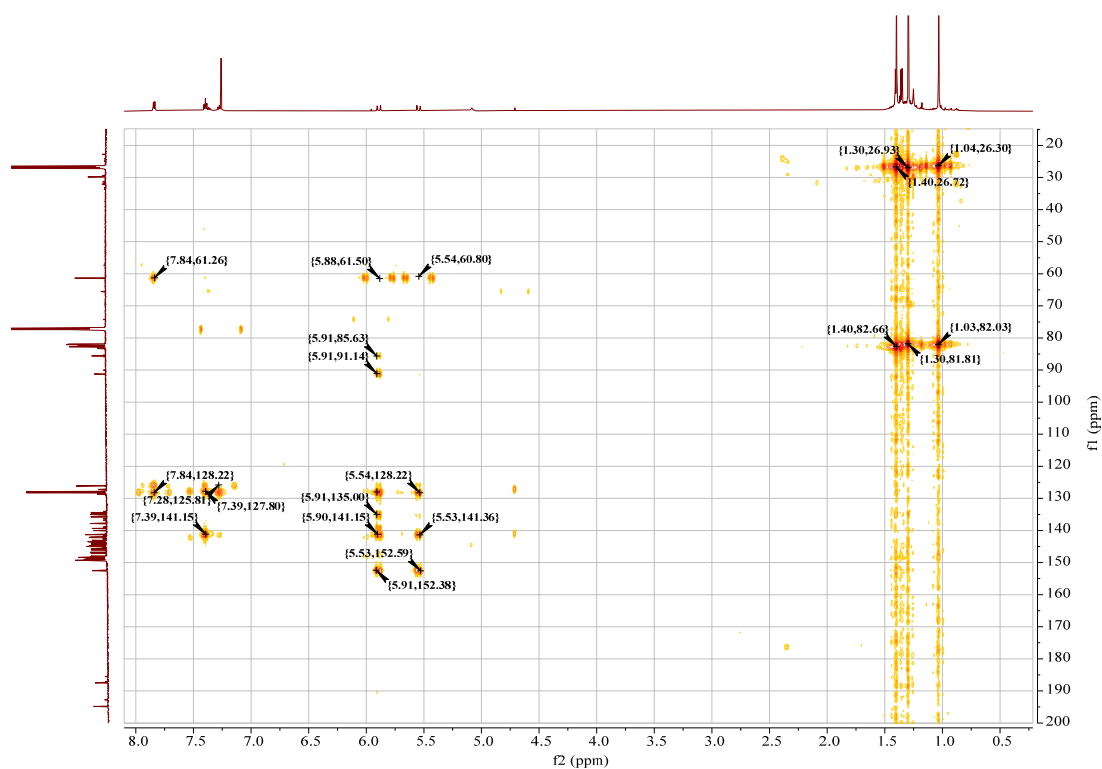

Figure S10 HMBC NMR spectrum of **4** (in  $\text{CDCl}_3$ )

Peking University Mass Spectrometry Sample Analysis Report

Analysis Info

Analysis Name FTMS-23080047\_Pos\_20230809\_000011.d  
 Sample 8  
 Comment

Acquisition Date 8/10/2023 5:17:21 PM  
 Instrument Bruker Solarix XR FTMS  
 Operator Peking University

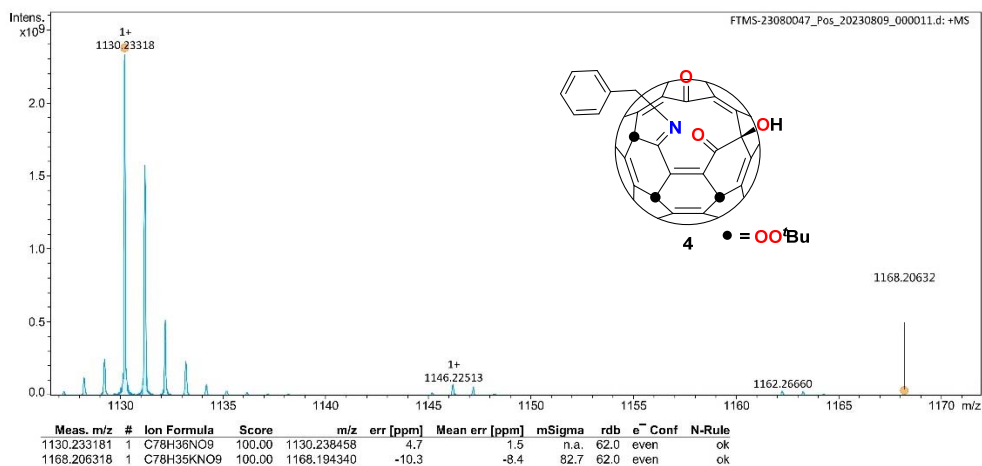

Figure S11 Mass spectrum of **4** (in CDCl<sub>3</sub>)

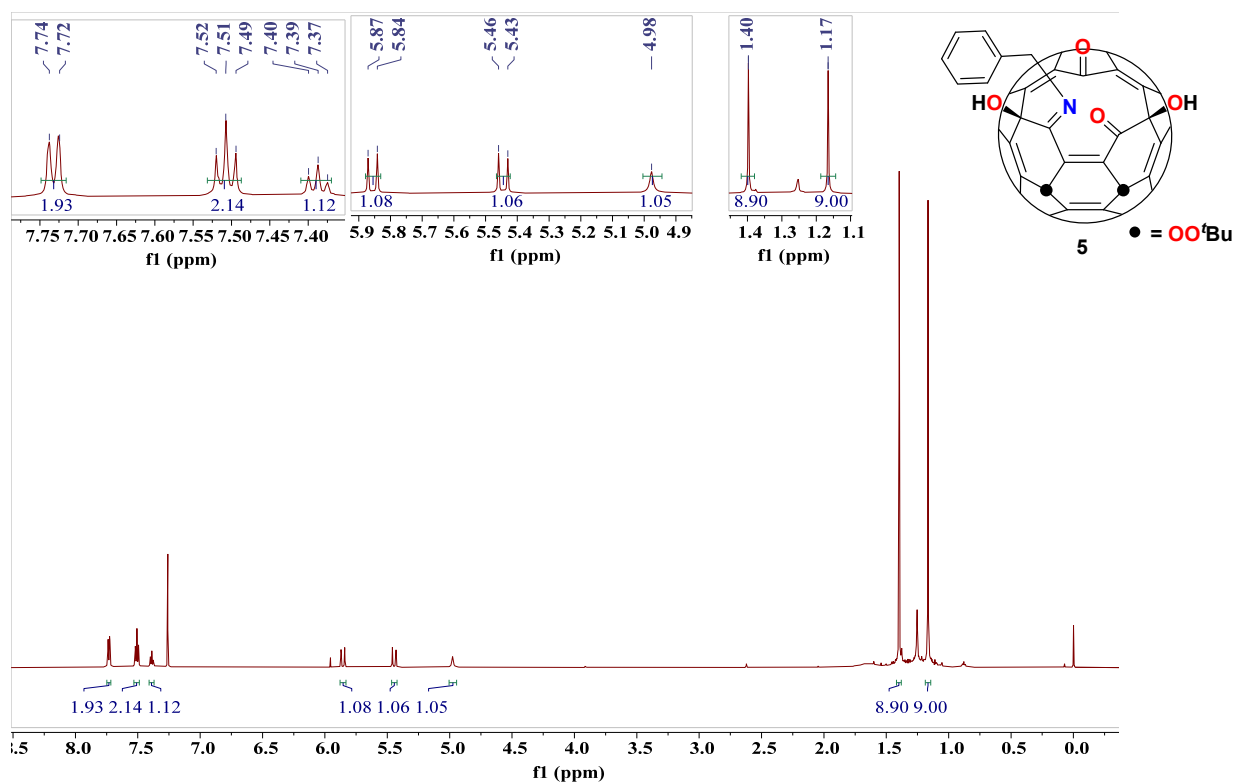

Figure S12 <sup>1</sup>H NMR spectrum of **5** (in CDCl<sub>3</sub>)

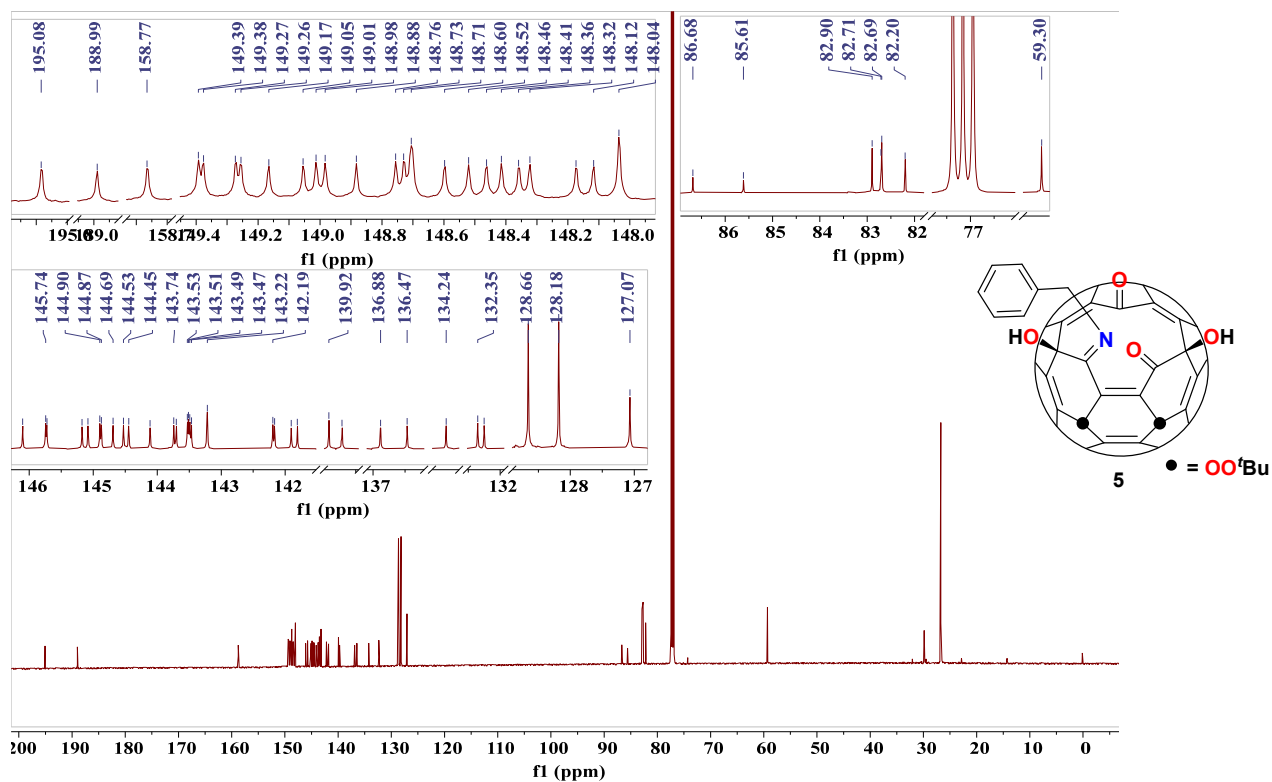

Figure S13  $^{13}\text{C}$  NMR spectrum of **5** (in  $\text{CDCl}_3$ )

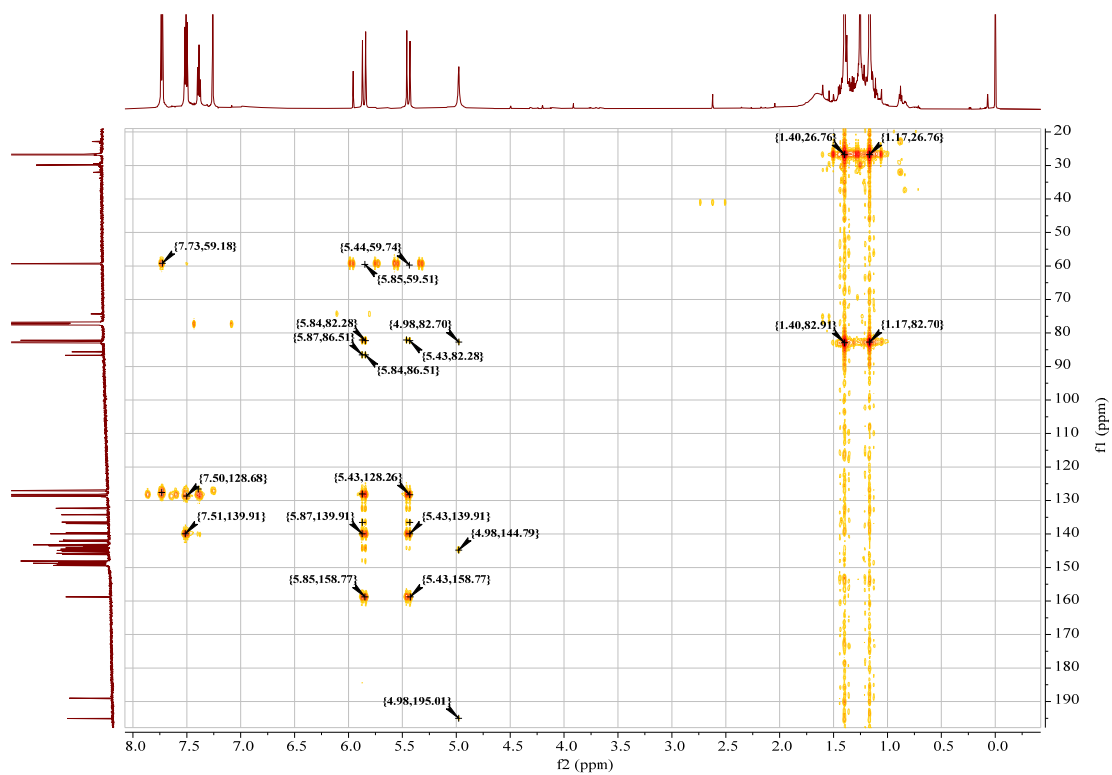

Figure S14 HMBC NMR spectrum of **5**



## Peking University Mass Spectrometry Sample Analysis Report

### Analysis Info

Analysis Name  
Sample  
Comment

FTMS-23080084\_Pos\_20230816\_000005.d  
9

Acquisition Date  
Instrument  
Operator

8/16/2023 7:17:13 PM  
Bruker Solarix XR FTMS  
Peking University

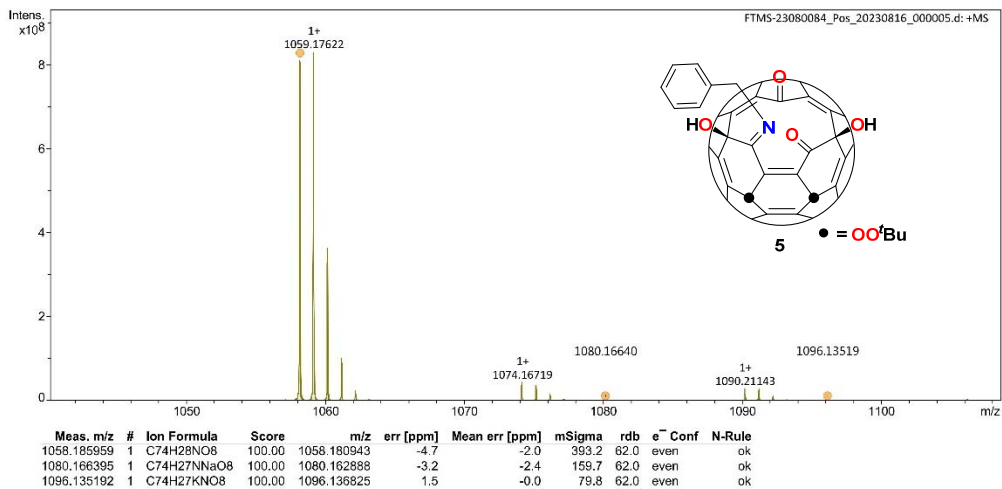

Figure S15 Mass spectrum of **5**

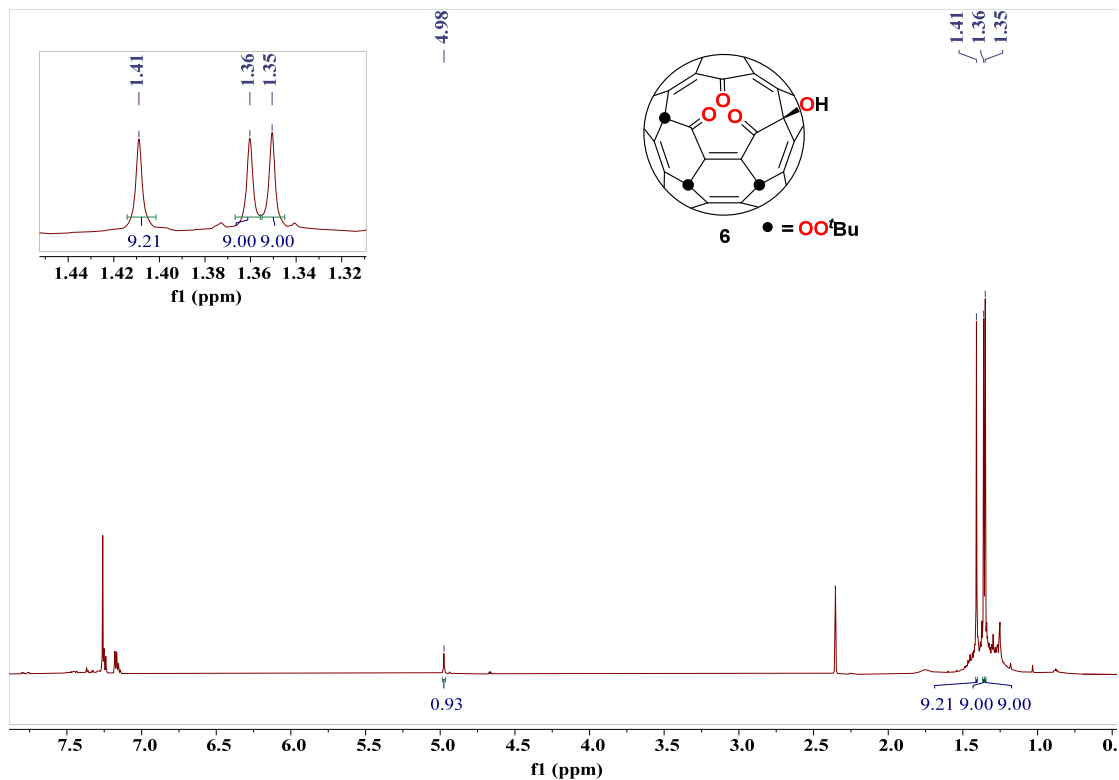

Figure S16 <sup>1</sup>H NMR spectrum of **6** (in CDCl<sub>3</sub>)

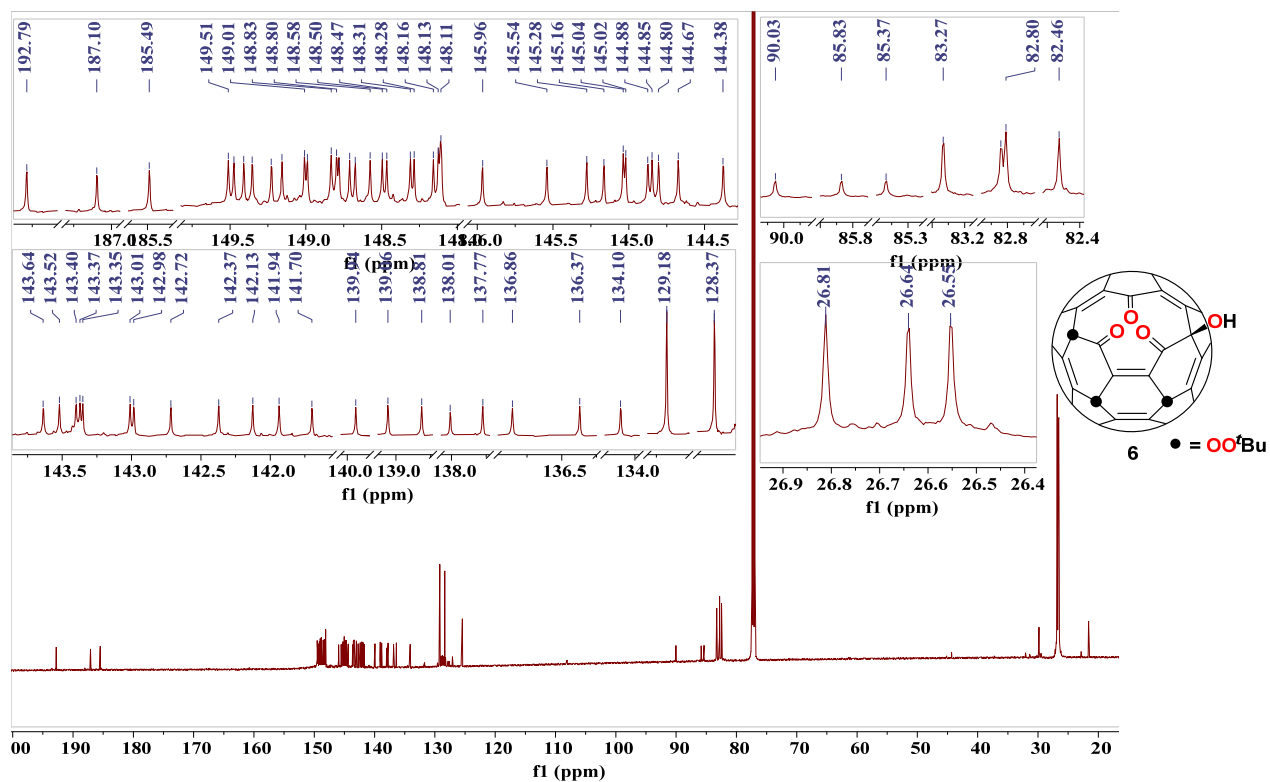

Figure S17  $^{13}\text{C}$  NMR spectrum of **6** (in  $\text{CDCl}_3$ )

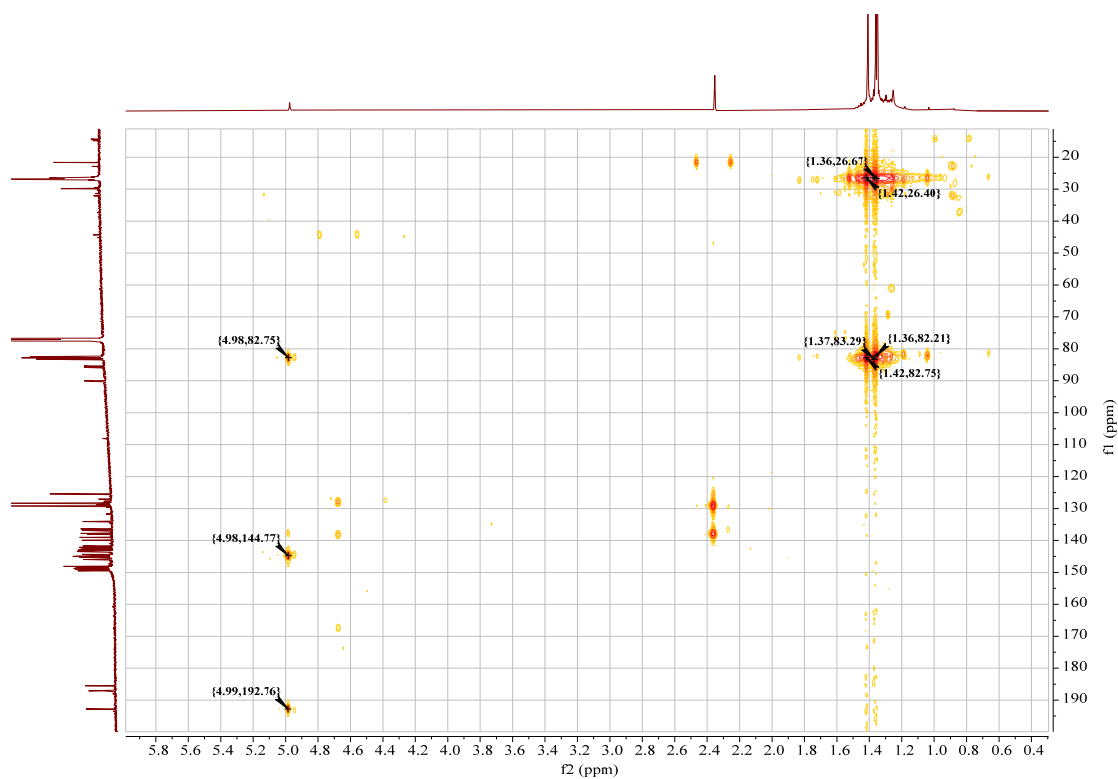

Figure S18 HMBC NMR spectrum of **6** (in  $\text{CDCl}_3$ )

## Peking University Mass Spectrometry Sample Analysis Report

### Analysis Info

Analysis Name FTMS-23090115\_Pos\_20230915\_000002.d  
 Sample 10  
 Comment

Acquisition Date 9/15/2023 9:52:31 PM  
 Instrument Bruker Solarix XR FTMS  
 Operator Peking University

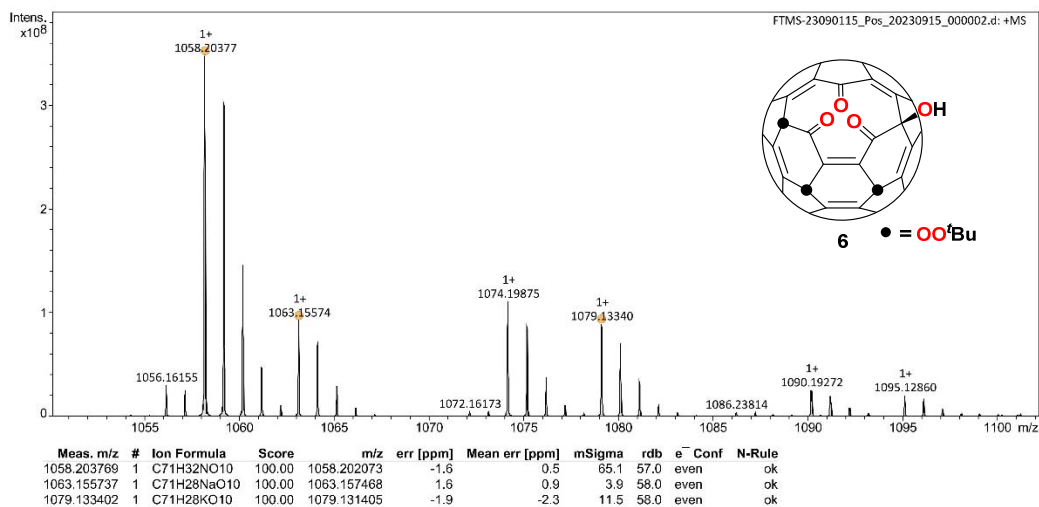

Figure S19 Mass spectrum of **6**

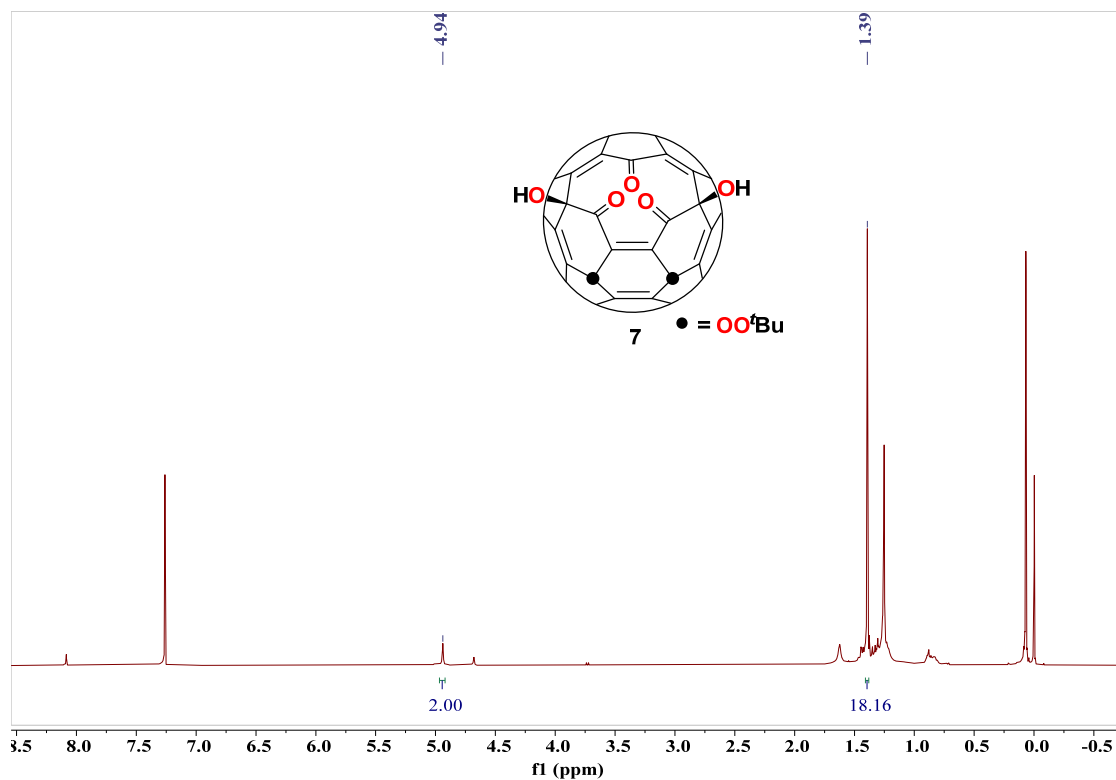

Figure S20 <sup>1</sup>H NMR spectrum of **7** (in CDCl<sub>3</sub>)

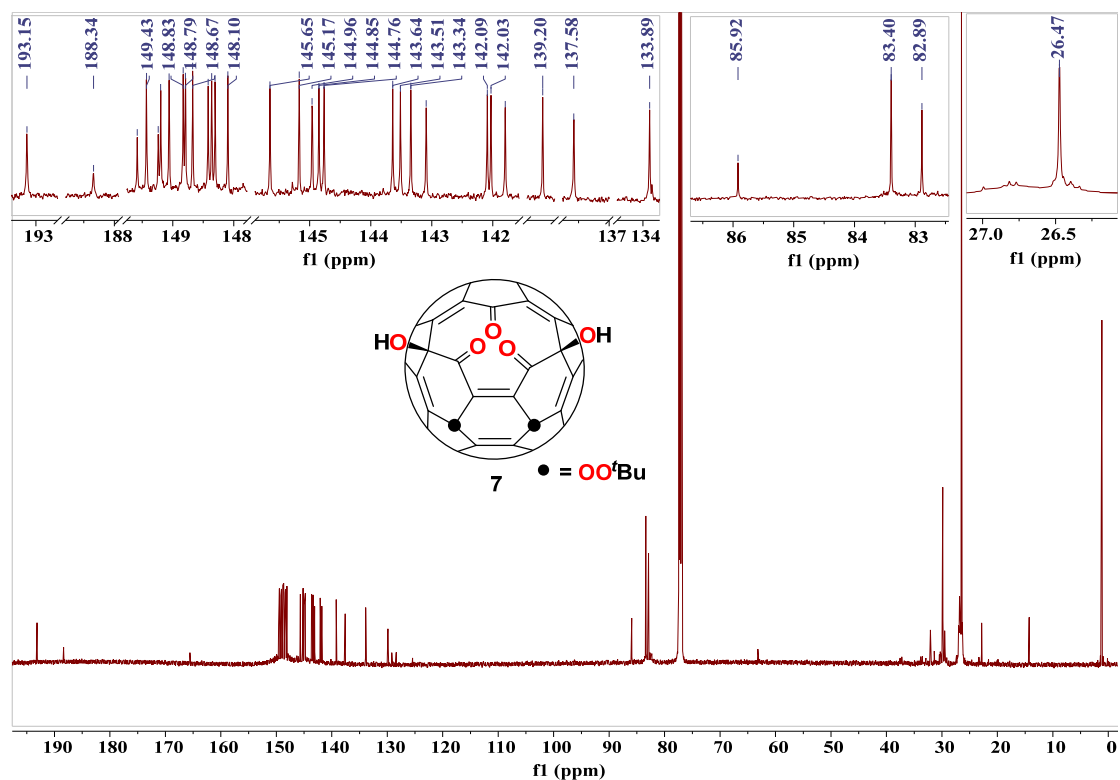

Figure S21  $^{13}\text{C}$  NMR spectrum of **7** (in  $\text{CDCl}_3$ )

### Peking University Mass Spectrometry Sample Analysis Report

**Analysis Info** FTMS-23120273\_Pos\_20231229\_000005.d  
**Analysis Name** 11  
**Sample**  
**Comment** C59(OOC4H9)2O3(OH)2  
**Acquisition Date** 12/29/2023 5:57:07 PM  
**Instrument** Bruker Solarix XR FTMS  
**Operator** Peking University

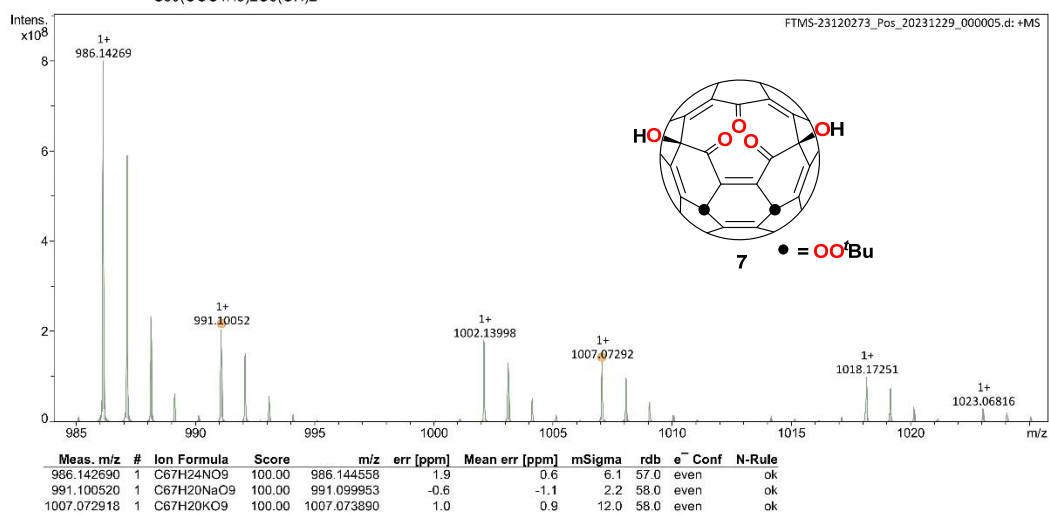

Figure S22 Mass spectrum of **7**

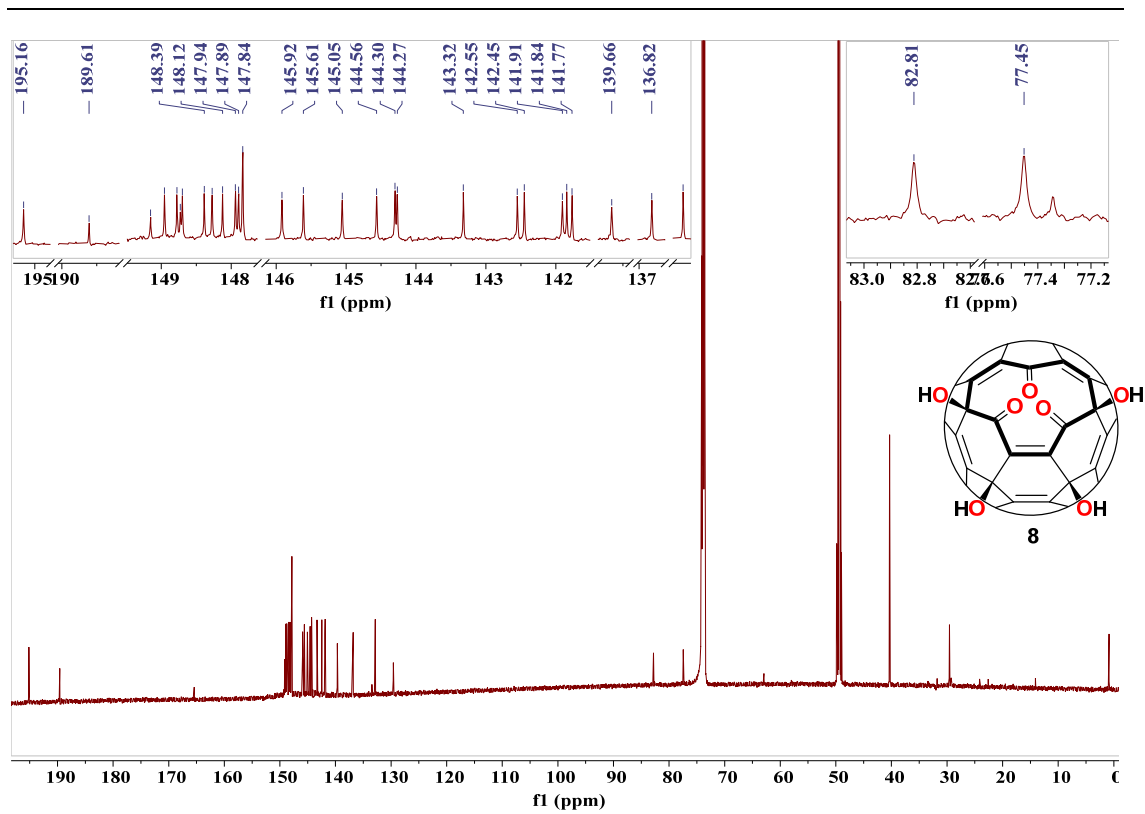

Figure S23  $^{13}\text{C}$  NMR spectrum of **8** (in  $\text{C}_2\text{D}_2\text{Cl}_4:\text{CD}_3\text{OD} = 50:1$ )

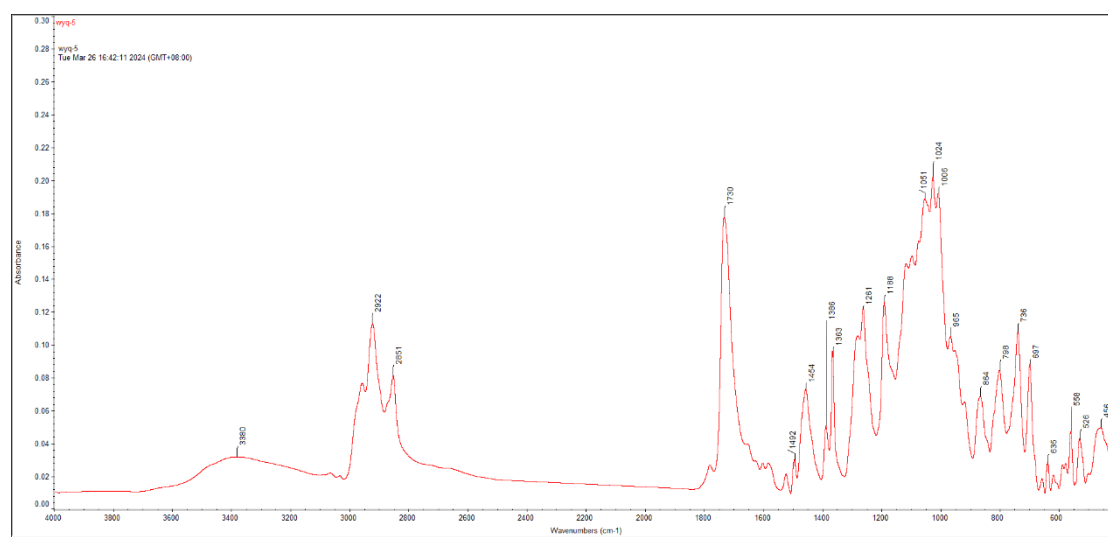

Figure S24 IR spectrum of **5**

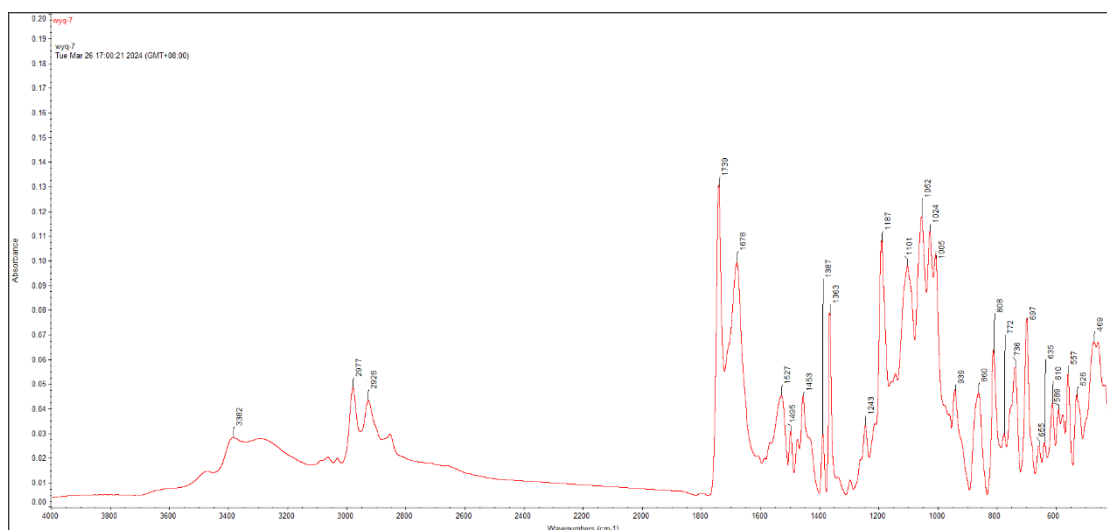

Figure S25 IR spectrum of 7

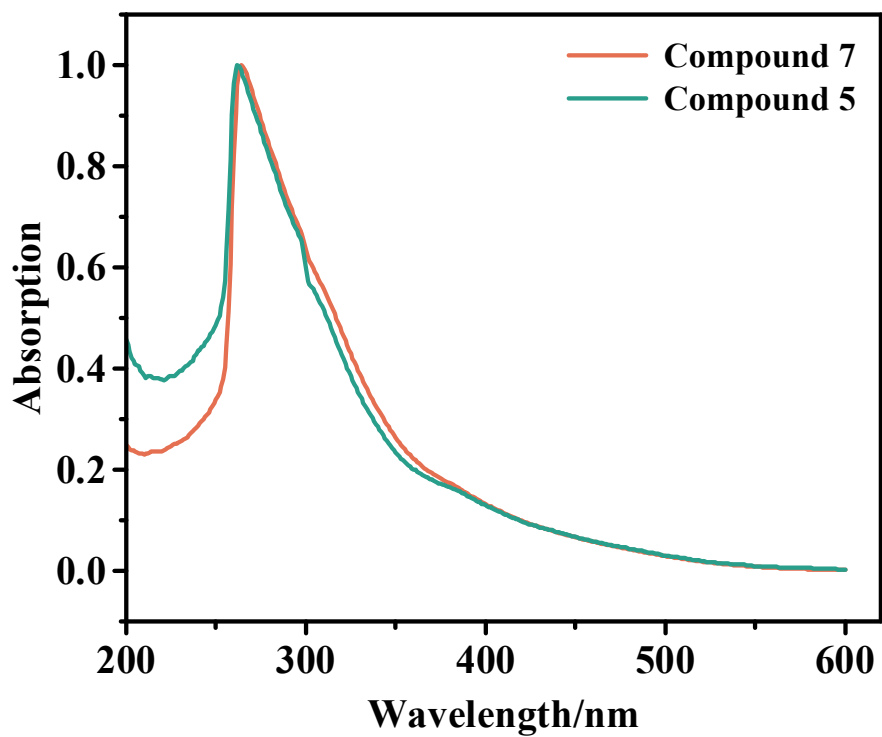

Figure S26 UV-Vis spectra of 5 and 7 in CH<sub>2</sub>Cl<sub>2</sub>
